# Supplementary material for: DNA-Aptamer-Based qPCR Using Light-Up Dyes for the Detection of Nucleic Acids
Source: PubMed Central journal article supplement — ACS Omega. 2023 Nov 28;8(49):47277–82. doi: 10.1021/acsomega.3c07599 (PMC10719997; doi:10.1021/acsomega.3c07599), 2023-11-28
Supplement: ao3c07599_si_001.pdf [file ao3c07599_si_001.pdf]

## Supporting Information

# A DNA-aptamer based qPCR using light-up dyes for the detection of nucleic acids

Shivansh Goyal<sup>1, 2</sup>, Prashant Singh<sup>1</sup>, Sudeshna Sengupta<sup>1</sup>, Anantha Barathi Muthukrishnan<sup>1</sup> and

Guhan Jayaraman<sup>1, \*</sup>

<sup>1</sup>Department of Biotechnology, Bhupat and Jyoti Mehta School of Biosciences, Indian Institute of Technology Madras, Chennai, Tamil Nadu, 600036, India

<sup>2</sup>Current affiliation: Department of Molecular Biosciences, University of Texas at Austin, Austin, TX, USA

\*Correspondence: [guhanj@iitm.ac.in](mailto:guhanj@iitm.ac.in);

## Table of Contents

Supporting Figure 1 .....2

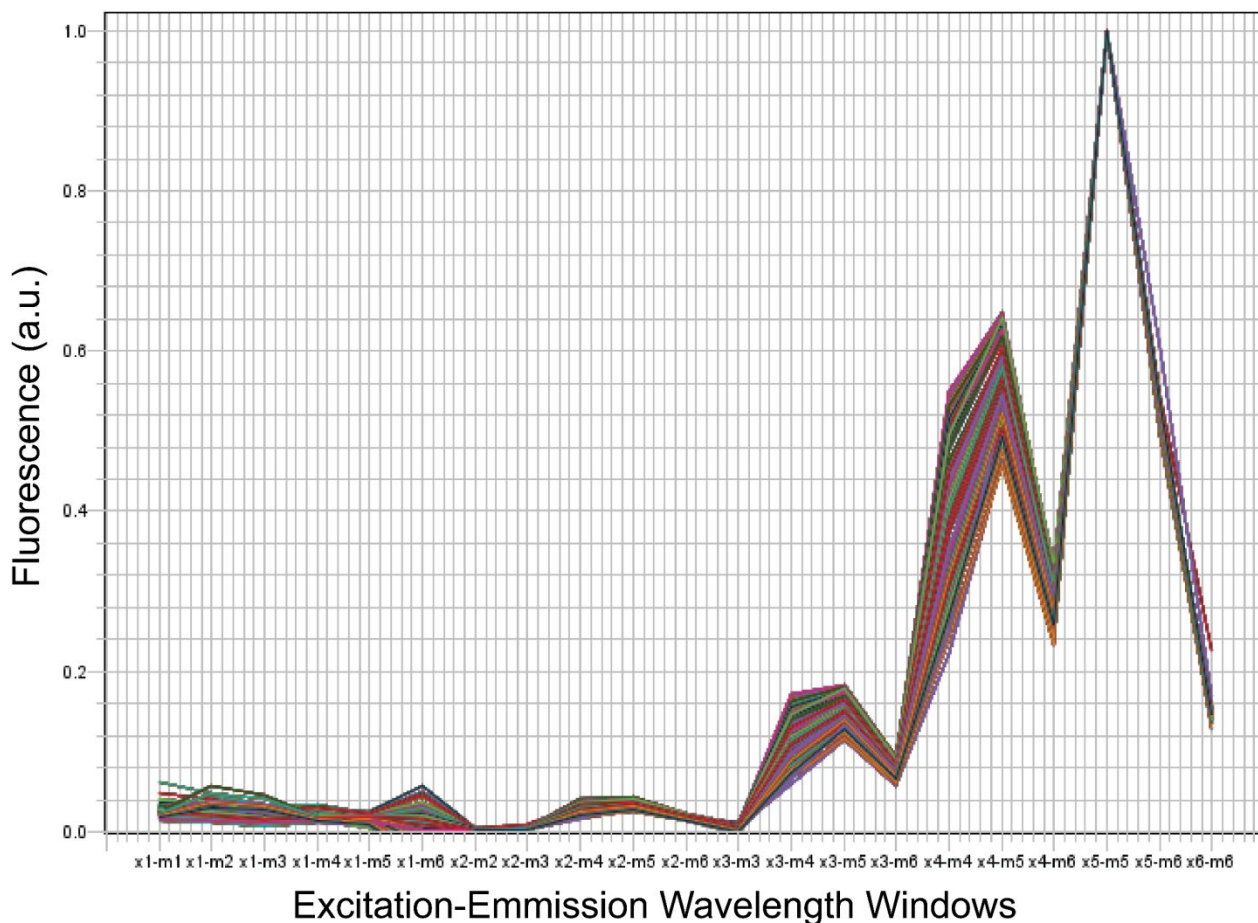

**Supporting Figure 1: Fluorescence calibration of DIR dye with DIR2-1 aptamer**

A 96-well plate with 20  $\mu$ L total volume in each well with 400 nM DIR dye and 400 nM DIR2-1 aptamer was calibrated on the qPCR instrument based on manufacturer's protocol. The excitation filter sets are x1:  $470 \pm 15$  nm, x2:  $520 \pm 10$  nm, x3:  $549.5 \pm 10$  nm, x4:  $580 \pm 10$  nm, x5:  $640 \pm 10$  nm, and x6:  $662 \pm 10$  nm; the emission filter sets are m1:  $520 \pm 15$  nm, m2:  $558 \pm 12$  nm, m3:  $586.5 \pm 10$  nm, m4:  $623 \pm 14$  nm, m5:  $682 \pm 14$  nm, and m6:  $711 \pm 12$  nm. A strong, sharp and consistent peak was observed for all the 96 samples using the excitation filter x5:  $640 \pm 10$  nm and emission filter m5:  $682 \pm 14$  nm.
